## RESPONSES OF REGULARLY-FIRING *APLYSIA* R<sub>3</sub>-R<sub>13</sub> NEURONES TO NORMOXIA AND HYPOXIA

By PHILIP E. COYER

*Department of Neurology and the Neurosciences Program, University of Alabama in Birmingham, Birmingham, Alabama 35294, U.S.A.*

*(Received 11 January 1983—Accepted 6 May 1983)*

### SUMMARY

1. Exposure of 10 R<sub>3</sub>-R<sub>13</sub> neurones to a 115-min period of hypoxia resulted in depolarization of their membrane potentials ( $E_M$ ) from a mean of  $-46.9 \pm 3.1$  to  $-20.8 \pm 4.4$  mV (S.E.).

2. Intracellular potassium ion activities ( $a_K^i$ ) decreased significantly from  $118.9 \pm 5.1$  to  $67.7 \pm 8.5$  mM-K<sup>+</sup>. This is equivalent to a change in  $E_K$  from  $-70.9$  mV to  $-54.5$  mV, which is insufficient to account for depolarization of approximately 26 mV.

3. During reoxygenation of the saline surrounding the ganglion, there was a continued depolarization of  $E_M$  to  $-11.5 \pm 3.2$  mV and progressive fall in  $a_K^i$  to  $49.2 \pm 4.9$  mM.

4. Decreases in the membrane slope resistance were also observed in these depolarizing neurones. The depression in resistance remained irreversible for as long as experiments were conducted.

5. Computations of  $P_{Na}/P_K$  ratios were made using a steady-state calculation. Increases in the  $P_{Na}/P_K$  ratio from 0.030 to 0.045 were observed during hypoxic depolarization using a modification of the Goldman equation which neglects the contribution of chloride ions. Subsequent depolarization and loss of  $a_K^i$  during reoxygenation elevated this value to 0.183. Whether or not the observed depression of the membrane resistance is linked to a change in either the sodium or potassium ion permeability is unknown. Release of neurotransmitter and related permeability changes cannot be ruled out as an effect of hypoxia.

### INTRODUCTION

In L<sub>2</sub>-L<sub>6</sub> neurones of *Aplysia californica*, hypoxia has been observed to cause reversible increases in intracellular potassium ion activities ( $a_K^i$ ) and concomitant membrane hyperpolarizations (Coyer, Halsey & Strong, 1983). It was concluded that these reversible changes seem to be brought about by augmentation of the sodium pump, possibly as a result of stimulation of ATP synthesis *via* glycolytic feedback. For regularly-firing neurones of the upper right quadrant R<sub>3</sub>-R<sub>13</sub>, Chaplain (1976, 1979), Chen, von Baumgarten & Takeda (1971), and Chen, von Baumgarten & Harth (1973) have shown that signalling patterns of these neurones are altered by compounds whose

Reprint requests to: P. E. Coyer Ph.D., Department of Neurosurgery, The Elliott Neurological Center of the Pennsylvania Hospital, Eighth and Spruce Streets, Philadelphia, Pennsylvania 19107, U.S.A.

Key words: Potassium, hypoxia, membrane potential.

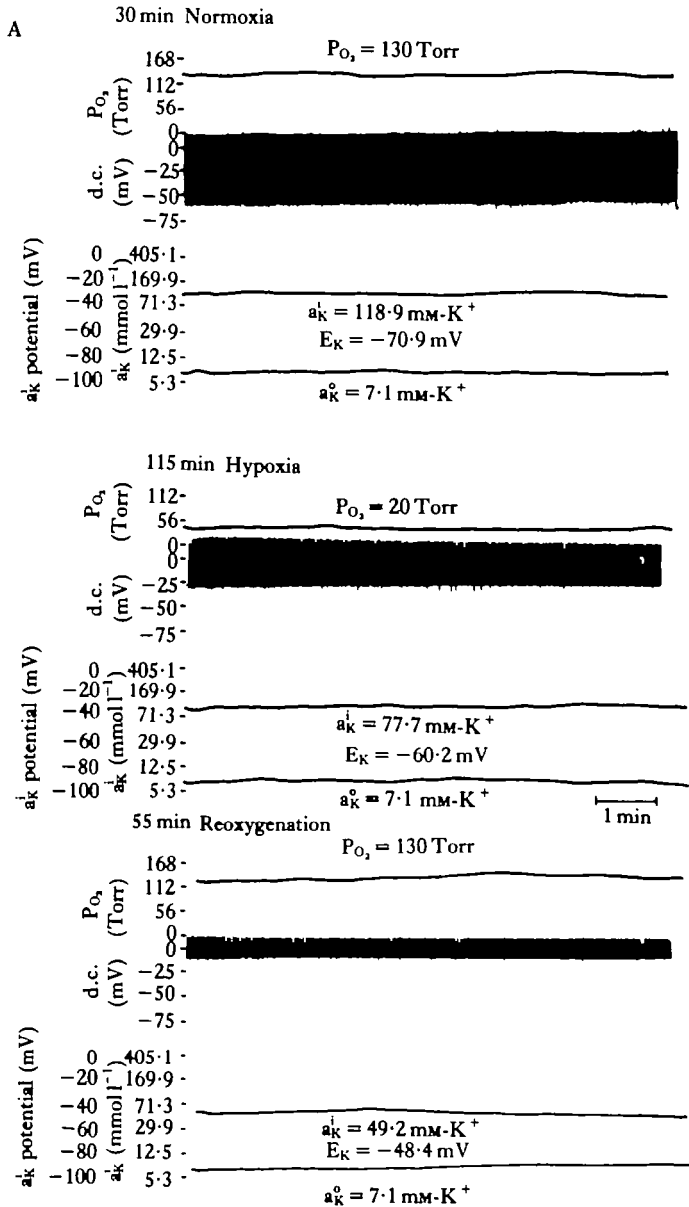

Fig. 1. (A) Records obtained from an R<sub>3</sub>-R<sub>13</sub> neurone during normoxia (top), hypoxia (middle) and reoxygenation (bottom), showing changes in  $P_{O_2}$  (upper trace), membrane potential ( $E_M$ , middle trace), and the intracellular and extracellular ( $a_K$  and  $a_K^o$ ) potassium ion activities (lower traces). The potassium equilibrium potential,  $E_K$ , was calculated from the relative values of the potassium ion activities. Membrane depolarization and a concomitant loss of  $a_K$  are shown in the middle panel following 115 min of hypoxia. The irreversibility of this response is shown in the bottom panel in which the membrane potential and  $a_K$  continue to decrease following reoxygenation. (B) Dynamic current voltage curves for 1 of the 10 neurones during normoxia (curve 1), after 60 min hypoxia (curve 2), 115 min hypoxia (curve 3), and after 55 min reoxygenation (curve 4). Membrane slope resistance is indicated by the slope of the line tangent to the curve, and shows a progressive decrease during hypoxia and reoxygenation.

In the present paper, hypoxia is shown to cause irreversible decreases in intracellular potassium ion activity ( $a_K^i$ ), membrane potential ( $E_M$ ), and membrane slope resistance of R<sub>3</sub>-R<sub>13</sub> neurones. Computations of the relative permeability ratios ( $P_{Na}/P_K$ ), based upon a modification of the Goldman equation, are also expressed for the responses of these neurones to normoxia and hypoxia (see Coyer, 1981; Coyer *et al.* 1983). Irreversible effects of hypoxia upon membrane potential and input resistance have been given in a preliminary report (Coyer, Halsey & Strong, 1981).

## MATERIALS AND METHODS

**B**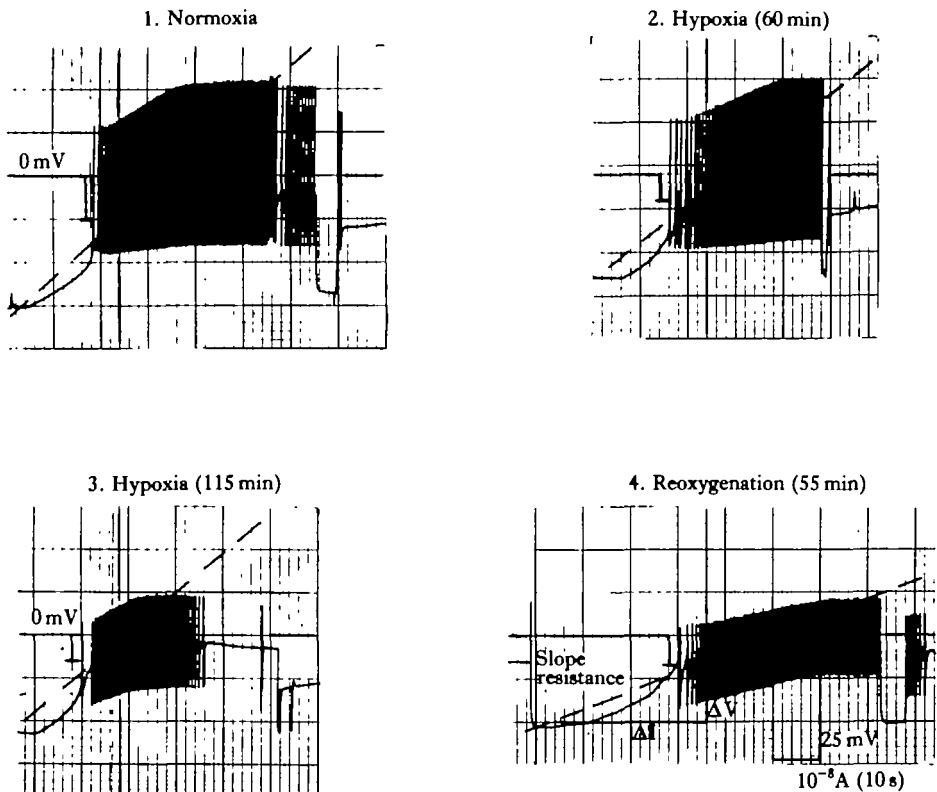

**Fig. 1B**

normoxia corresponding to a  $P_{O_2}$  between 130 and 150 Torr, 115 min of hypoxia ( $P_{O_2} = 12\text{--}20$  Torr), and 55 min of reoxygenation. Intracellular potassium ion activity was measured using double-barrelled,  $K^+$ -selective microelectrodes (Walker, 1971; Khuri, Hajjar & Agulian, 1972; Vyskočil & Kříž, 1972). The construction of these microelectrodes has been adequately described by Vyskočil & Kříž (1972), Schlue & Deitmer (1980) and Deitmer & Schlue (1981), and their usage in making intracellular measurements in *Aplysia* neurones has been described by Coyer *et al.* (1983). Dynamic current voltage curves were constructed by passing a linear, depolarizing current across the neural membrane (see Coyer *et al.* 1983). The outputs of high input impedance d.c. amplifiers were displayed on high fidelity penwriters (Gould) and recorded on a four-channel FM magnetic tape recorder (Hewlett-Packard). Oxygen microelectrodes and  $P_{O_2}$  determinations were made following the techniques described by Coyer *et al.* (1983). Normal *Aplysia* saline consisted of: 425 mM-NaCl, 10 mM-KCl, 10 mM- $CaCl_2$ , 22 mM- $MgCl_2$ , 26 mM- $MgSO_4$ , 2.5 mM- $NaHCO_3$ , 10 mM-Tris-HCl (pH = 7.3). Saline was delivered constantly at a rate of  $10\text{ ml min}^{-1}$  to the experimental bath from a reservoir located above it. Hypoxia was arbitrarily defined as a suffusate  $P_{O_2}$  below 20 Torr, which probably corresponds to an intracellular  $P_{O_2}$  of 5–7 Torr (Coyer *et al.* 1978). The calculation used in determining the relative permeability ratios ( $P_{Na}/P_K$ ) from the values of the intracellular

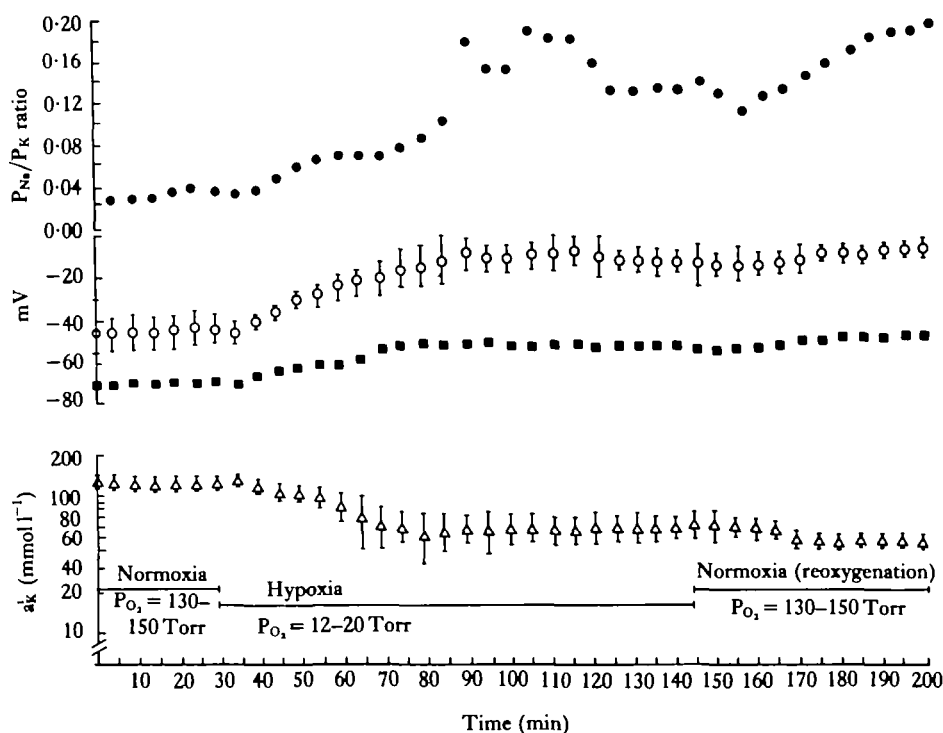

Fig. 2. Means  $\pm$  standard errors ( $\bar{x} \pm s.e.$ ) corresponding to  $E_M$  ( $\circ$ ),  $a_K$  ( $\triangle$ ), and the computed values for  $E_K$  ( $\blacksquare$ ) and the  $P_{Na}/P_K$  ( $\bullet$ ) ratios are presented graphically for seven  $R_1\text{--}R_{13}$  neurones whose responses to normoxia, hypoxia and reoxygenation were studied. Moreover,  $a_K$  decreased thus making  $E_K$  more positive. The computed  $P_{Na}/P_K$  ratios also increased. These changes in  $E_M$ ,  $a_K$ ,  $E_K$  and  $P_{Na}/P_K$  were irreversible upon subsequent reoxygenation.

potassium ion activities was as described elsewhere (Coyer, 1981; Coyer *et al.* 1983). Means and standard errors ( $\bar{x} \pm \text{s.e.}$ ) of  $E_M$  and  $a_K^i$  were computed using sample statistical procedures. Mean values of these variables were used in solving the equations for  $E_K$ , the potassium equilibrium potential and the  $P_{Na}/P_K$  ratio.

## RESULTS

### *Determinations of $E_M$ , $a_K^i$ and $P_{Na}/P_K$ ratios in $R_3$ - $R_{13}$ neurones during normoxia, hypoxia and reoxygenation*

#### *Hypoxic depolarization and decreases in the intracellular potassium ion activity*

Hypoxia produced a depolarization of the membrane potential ( $E_M$ ) and loss of intracellular potassium activity ( $a_K^i$ ) that continued during reoxygenation (Fig. 1A). In 10 cells, a 115-min period of hypoxia produced a depolarization of their membrane potentials ( $E_M$ ) from a mean of  $-46.9 \pm 3.1$  to  $-20.8 \pm 4.4$  mV (s.e.). In addition, intracellular potassium ion activities ( $a_K^i$ ) decreased significantly from  $118.9 \pm 5.1$  to  $67.7 \pm 8.5$  mM- $K^+$ . Computed values of the potassium equilibrium potential ( $E_K$ ) were  $-70.9$  mV and  $-54.5$  mV respectively. During reoxygenation of the saline surrounding the ganglion, there was a continued depolarization of  $E_M$  to  $-11.5 \pm 3.2$  mV and progressive fall in  $a_K^i$  to  $49.2 \pm 4.9$  mM. During hypoxia, there was a depolarization of approximately 26 mV as opposed to a change in  $E_K$  of 16 mV. Therefore, the extent of the depolarization is greater than could be accounted for by the change in

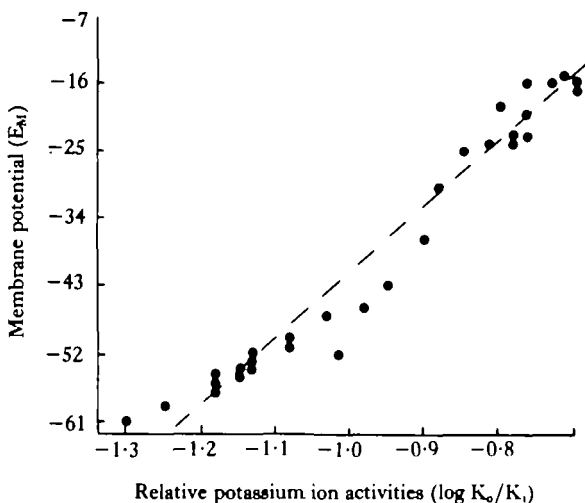

Fig. 3. The data for  $E_M$  and  $a_K^i$  were plotted in the form of  $E_M$  as a function of the logarithm of  $K_o/K_i$  assuming  $K_o$  remained constant having a value equal to  $7.1$  mM- $K^+$ . Since a high perfusion rate of  $10$  ml  $\text{min}^{-1}$  was utilized, no fluctuations in  $a_K^i$  were observed with hypoxia. This method is similar to that of Coyer, Halsey & Strong, (1983). A slope of  $89.3$  mV indicates that the observed hypoxic depolarization could be accounted for not only by decreases in  $a_K^i$  but also changes in the  $P_{Na}/P_K$  ratio since a Nernstian slope was not observed.

$E_K$ . The computed  $P_{Na}/P_K$  ratios (Fig. 2, solid circles) increased from a value of 0.028–0.031 to 0.045. The irreversibility of this increase in the  $P_{Na}/P_K$  ratio and the continuing depolarization and loss of  $a_K$  are shown in the right portion of Fig. 1A as the  $P_{Na}/P_K$  ratio reaches a value of 0.183.

Values for  $E_M$  were replotted as a function of  $a_K$  (Fig. 3). Again the calculated slope of 89.3 mV shows that the depolarization cannot be explained by changes in  $E_K$  only.

#### *Decreases in the membrane slope resistance of $R_3$ - $R_{13}$ neurones during hypoxia*

Membrane slope resistance decreased during hypoxia and reoxygenation (Fig. 1B).

### DISCUSSION

The results suggest that hypoxia causes irreversible depolarization of  $R_3$ - $R_{13}$  neurones occupying the *Aplysia* abdominal ganglion, together with a decrease in  $a_K$  and  $E_K$ . The calculated  $P_{Na}/P_K$  ratio increased as the neurones continued to depolarize at a level which was not commensurate with changes in  $E_K$ . Thus, the depolarization could be caused by a change in  $a_K$  together with a change in  $P_{Na}/P_K$ . An important, alternative explanation which could account for the depolarizations could be that these cells have an electrogenic sodium pump whose contribution is important in maintaining the resting membrane potential (see Discussion below). Similar changes in membrane potential, which were found to exist in  $R_2$  by Carpenter & Alving (1968) during inhibition of the sodium pump, may account for the discrepancy between changes in membrane potential and  $E_K$  in the  $R_3$ - $R_{13}$  neurones.

#### *Hypotheses concerning the effects of hypoxia on $R_3$ - $R_{13}$ neurones*

The depression in the membrane resistance and associated decreases in  $a_K$  and  $E_M$  indicate that the membranes of these cells become more permeable to either sodium, chloride, potassium or a combination of these ions during hypoxia. Substantial increases in the  $P_{Na}/P_K$  ratios during hypoxia are shown in Fig. 2 (closed circles). The decrease in membrane resistance during hypoxia is consistent with these observed increases in the  $P_{Na}/P_K$  ratios. The observed irreversible nature of membrane depolarization, loss of  $a_K$ , and depression of the membrane resistance might be expected from changes in ionic permeabilities.

Normally, the metabolically-dependent sodium pump contributes to the membrane potential by maintaining the asymmetric distribution of ions across the neural membrane. It has been suggested that molluscan neurones have ATP reserves sufficient for 20–30 min of normal sodium pumping providing the intracellular  $P_{O_2}$  is higher than 20 Torr, as exists under normal, aerated conditions of intracellular recording (Kerkut & York, 1969; Junge & Oritz, 1978). Kerkut & York (1969) demonstrated the oxygen sensitivity of the electrogenic sodium pump in brain neurones of the snail *Helix* by injecting cells with sodium and potassium ions. Finding that sodium-injected neurones had membrane potentials which were more dependent upon  $P_{O_2}$  than did potassium-injected neurones, Kerkut & York (1969) concluded that the sodium pump relies heavily upon the process of oxidative phosphorylation to supply energy in the form of ATP or another high-energy phosphate containing compound. More than likely, the metabolic reserves of the  $R_3$ - $R_{13}$  neurones are

consumed during a 115-min period of hypoxia under correspondingly low intracellular P<sub>O</sub><sub>2</sub> conditions.

Tonic release of neurotransmitter has been mentioned as a possible effect of hypoxia on the L<sub>2</sub>-L<sub>6</sub> neurones (Coyer *et al.* 1983). Pinsker & Kandel (1969) have demonstrated the sensitivity of the pump current in L<sub>5</sub> to the presynaptic influence of interneurone L<sub>10</sub>. It is possible either that the sodium pump of R<sub>3</sub>-R<sub>13</sub> neurones is modulated by presynaptic sources and neurotransmitter release during hypoxia, or that these permeability changes result from synaptic inputs. In addition, Mayeri, Brownell, Branton & Simon (1979*a*) and Mayeri, Brownell & Branton (1979*b*) have shown the tonic influences resulting from release of egg-laying hormone (ELH) contained in bag cells on these and other neurones within the ganglion. Since the bag cells were not isolated from these R<sub>3</sub>-R<sub>13</sub> cells, this may be a factor worthy of consideration. However, during current stimulation of the bag cells (i.e. to release ELH), only slow inhibition and some instances of transient excitation were observed (Mayeri *et al.* 1979*b*). Depolarization and release of intracellular potassium were observed in these studies of hypoxia which is in opposition to those which were shown to be mediated by ELH (Mayeri *et al.* 1979*b*).

*Possible differences between R<sub>3</sub>-R<sub>13</sub> and L<sub>2</sub>-L<sub>6</sub> neurones accounting for the disparate responses to hypoxia*

Both groups of neurones are oxygen sensitive although prolonged hypoxic exposure has opposite effects on the membrane potentials and intracellular potassium ion activities of these two groups of cells. One can only speculate that the R<sub>3</sub>-R<sub>13</sub> neurones have a greater pump dependence for the membrane potential and that hypoxia steadily upsets the ionic imbalance of sodium, potassium and chloride ions across the neural membrane which contributes to the membrane potential. This difference may reflect an intrinsic difference in the active pump sites or possibly the metabolism of each cell type and its capability to provide ATP for operation of the pump. As suggested in an earlier paper (Coyer *et al.* 1983), activity of the sodium pump in L<sub>2</sub>-L<sub>6</sub> neurones may be stimulated by decreasing oxygen conditions through glycolytic feedback and ATP synthesis. In R<sub>3</sub>-R<sub>13</sub> neurones this phenomenon may not occur due to differences in the metabolic machinery of these cells. Future experiments are planned to test this hypothesis by testing their pump sensitivities to ouabain and also by injecting intermediary compounds, such as ADP and citrate, into R<sub>3</sub>-R<sub>13</sub> and L<sub>2</sub>-L<sub>6</sub> neurones using a pressure microinjection system. In each of these groups of neurones, these experiments will test how prevalent the sodium pump is and whether or not it can be stimulated by intermediary compounds which may be thought to stimulate ATP synthesis through glycolytic feedback mechanisms.

This research was supported in part by Grants NINCDS NS 08802 and NS 07123.

#### REFERENCES

- CARPENTER, D. O. & ALVING, B. O. (1968). A contribution of an electrogenic Na<sup>+</sup> pump to membrane potential in *Aplysia* neurones. *J. gen. Physiol.* **52**, 1-21.
- CHAPLAIN, R. A. (1976). Metabolic regulations of the rhythmic activity in pacemaker neurones. II. Metabolically-induced conversions of beating to bursting activity in isolated *Aplysia* neurons. *Brain Res.* **106**, 307-319.

- CHAPLAIN, R. A. (1979). Metabolic control of neuronal activity and the rhythmic organization of central nervous functions. *J. exp. Biol.* **81**, 113–130.
- CHEN, C. F., VON BAUMGARTEN, R. & TAKEDA, R. (1971). Pacemaker properties of completely isolated neurones in *Aplysia californica*. *Nature, Lond.* **233**, 27–29.
- CHEN, C. F., VON BAUMGARTEN, R. & HARTH, O. (1973). Metabolic aspects of rhythmogenesis in *Aplysia* pacemaker neurones. *Pflügers Arch. ges. Physiol.* **345**, 179–193.
- COGGESHALL, R. E., KANDEL, E. R., KUPFERMANN, I. & WAZIRI, R. (1966). A morphological and functional study on a cluster of identifiable neurosecretory cells in the abdominal ganglion of *Aplysia californica*. *J. Cell. Biol.* **31**, 363–368.
- COYER, P. E. (1981). Corresponding increases in intracellular potassium ion activity and membrane hyperpolarization of identifiable *Aplysia* neurons during hypoxia suggests augmentation of active transport. *The Physiologist* **24**, 24 (abstract).
- COYER, P. E., HALSEY, J. H., JR. & STRONG, E. R. (1978). Measurements of oxygen partial pressure and single-unit action potentials in the parietovisceral ganglion of *Aplysia californica*. In *Adv. Exp. Med. Biol.*, Vol. 94, *Oxygen Transport to Tissue III*, (eds I. A. Silver, M. Erećinska & H. I. Bicher), pp. 729–734, Plenum.
- COYER, P. E., HALSEY, J. H., JR. & STRONG, E. R. (1981). Reversible and irreversible effects of  $P_{O_2}$  alterations on two groups of *Aplysia* neurons. *Comp. Biochem. Physiol.* **68A**, 579–587.
- COYER, P. E., HALSEY, J. H., JR. & STRONG, E. R. (1983). Reversible changes in the intracellular potassium ion activities and membrane potentials of *Aplysia* L<sub>2</sub>-L<sub>6</sub> neurones in response to normoxia and hypoxia. *J. exp. Biol.* **102**, 79–92.
- DEITMER, J. W. & SCHLUE, W. R. (1981). Measurements of the intracellular potassium activity of Retzius cells in the leech central nervous system. *J. exp. Biol.* **91**, 87–101.
- FRAZIER, W. T., KANDEL, E. R., KUPFERMANN, I., WAZIRI, R. & COGGESHALL, R. E. (1967). Identifiable cells in the abdominal ganglion of *Aplysia californica*. *J. Neurophysiol.* **30**, 1288–1351.
- JUNGE, D. & ORITZ, C. L. (1978). Measurement of electrogenic pump current in *Aplysia* neurones with constant-current and voltage techniques. *J. exp. Biol.* **72**, 141–151.
- KANDEL, E. R., FRAZIER, W. T., WAZIRI, R. & COGGESHALL, R. E. (1967). Direct and common connections among identified neurons in *Aplysia*. *J. Neurophysiol.* **30**, 1352–1376.
- KERKUT, G. A. & YORK, B. (1969). The oxygen sensitivity of the electrogenic sodium pump in snail neurones. *Comp. Biochem. Physiol.* **28**, 1125–1134.
- KHURI, R. N., HAJJAR, J. J. & AGULIAN, S. K. (1972). Measurement of intracellular potassium with liquid ion-exchange microelectrodes. *J. appl. Physiol.* **32**, 419–422.
- KOESTER, J. & KANDEL, E. R. (1977). Further identification of neurons in the abdominal ganglion of *Aplysia* using behavioral criteria. *Brain Res.* **121**, 1–20.
- MAYERI, E., BROWNELL, P., BRANTON, W. D. & SIMON, S. B. (1979a). Multiple, prolonged actions of neuroendocrine bag cells on neurons in *Aplysia*. I. Effects on bursting pacemaker neurons. *J. Neurophysiol.* **42**, 1165–1184.
- MAYERI, E., BROWNELL, P. & BRANTON, W. D. (1979b). Multiple, prolonged actions of neuroendocrine bag cells on neurons in *Aplysia*. II. Effects on beating pacemaker and silent neurons. *J. Neurophysiol.* **42**, 1185–1197.
- PINSKER, H. & KANDEL, E. R. (1969). Synaptic activation of an electrogenic sodium pump. *Science, N.Y.* **163**, 931–935.
- SCHLUE, W. R. & DEITMER, J. W. (1980). Extracellular potassium in neuropile and nerve cell body region of the leech central nervous system. *J. exp. Biol.* **87**, 23–43.
- VYSKOČIL, F. & KÉFZ, N. (1972). Modifications of single and double-barrel potassium specific microelectrodes for physiological experiments. *Pflügers Arch. ges. Physiol.* **337**, 265–276.
- WALKER, J. L., JR. (1971). Ion specific liquid exchanger microelectrodes. *Analyt. Chem.* **43**, 89A–93A.
